# Supplementary material for: Pitfalls of Single Measurement Screening for Diabetes and Hypertension in Community-Based Settings
Source: PubMed Central journal article supplement (PMC8641532; doi:10.5334/gh.1083), 2021-12-03
Supplement: gh-16-1-1083-s1.pdf [file gh-16-1-1083-s1.pdf]

## Supplementary material

|                       | Home visit completed   | Lost to follow-up    |
|-----------------------|------------------------|----------------------|
| Characteristic        | N = 1,886 <sup>1</sup> | N = 248 <sup>1</sup> |
| <b>Age</b>            | 59 (49, 68)            | 51 (39, 64)          |
| <b>Age categories</b> |                        |                      |
| 15–24                 | 62 (3.3%)              | 19 (7.7%)            |
| 25–44                 | 287 (15%)              | 67 (27%)             |
| 45–64                 | 932 (49%)              | 104 (42%)            |
| 65+                   | 605 (32%)              | 58 (23%)             |
| <b>Sex</b>            |                        |                      |
| Male                  | 439 (23%)              | 87 (35%)             |
| Female                | 1,447 (77%)            | 161 (65%)            |
| <b>BMI</b>            | 32 (27, 37)            | 30 (25, 36)          |
| <b>Systolic BP</b>    | 135 (120, 148)         | 139 (123, 149)       |
| <b>Diastolic BP</b>   | 80 (72, 91)            | 84 (74, 94)          |
| <b>HbA1c %</b>        | 6.60 (5.80, 7.50)      | 6.50 (5.80, 7.10)    |

<sup>1</sup>Median (IQR); n (%).

**Supplementary Table 1. Demographic characteristics of complete home visits compared to LTFU.**
