# Supplementary material for: Pitfalls of Single Measurement Screening for Diabetes and Hypertension in Community-Based Settings
Source: PubMed Central journal article supplement (PMC8641532; doi:10.5334/gh.1083), 2021-12-03
Supplement: gh-16-1-1083-s2.pdf [file gh-16-1-1083-s2.pdf]

## Acknowledgments

We thank the residents of the Africa Health Research Institute demographic surveillance area and their leaders for many years of continuous engagement in population health research. We are particularly grateful to those who engaged with Vukuzazi either through participation or through considering participation. We appreciate members of the Community Advisory Board for their crucial input throughout the lifecycle of the project. We additionally acknowledge the partnership of the local and provincial Department of Health in their support of this project. We thank all the members of the Vukuzazi Study Team (Table below) for their valuable contributions to this study. We dedicate this manuscript to the memory of Hlobisile Chonco.

### **Vukuzazi Team: Staff who significantly contributed to the implementation and conduct of Vukuzazi.**

\* Denotes team members who were closely involved with the design, implementation and oversight of Vukuzazi.

| <b>Name</b>               | <b>Role</b>                           |
|---------------------------|---------------------------------------|
| *Deenan Pillay            | Principal Investigator (2017-2019)    |
| *Willem Hanekom           | Principal Investigator (2019-present) |
| *Emily Wong               | Co-Principal Investigator             |
| *Mark Siedner             | Co-Principal Investigator             |
| *Olivier Koole            | Co-Principal Investigator (2017-2019) |
| *Thumbi Ndung'u           | Co-investigator                       |
| *Thandeka Khoza           | Co-investigator (2019-present)        |
| *Kobus Herbst             | Co-investigator                       |
| *Kathy Baisley            | Co-investigator                       |
| *Janet Seeley             | Co-investigator                       |
| *Alison Grant             | Co-investigator                       |
| *Resign Gunda             | Programme Manager                     |
| *Ashmika Surujdeen        | Study Coordinator                     |
| *Theresa Smit             | Head: Diagnostic Research             |
| *Dickman Gareta           | Head: Research Data Management        |
| *Day Munatsi              | Head: Research Data Systems           |
| *Ngcebo Mhlongo           | Study Physician                       |
| *Sanah Bucibo             | Lead Nurse                            |
| *Tshwaraganang Modise     | Research Data Manager                 |
| *Stephen Olivier          | Statistician                          |
| *Gregory Ording-Jespersen | Laboratory Data Supervisor            |
| *Innocentia Mpofana       | Diagnostic Laboratory Manager         |
| *Jaco Dreyer              | Senior Research Data Manager          |
| *Siyabonga Nxumalo        | Research Data Manager                 |
| *Khadija Khan             | Biorepository Manager                 |
| *Zizile Sikhosana         | Somkhele Laboratory Supervisor        |
| *Sashen Moodley           | Microbiology Laboratory Supervisor    |
| *Hollis Shen              | Head: Exploratory Research Division   |
| Kennedy Nyamande          | Pulmonology Consultant                |
| Mosa Suleman              | Pulmonology Consultant                |
| Jaikrishna Kalideen       | Radiologist                           |

|                          |                                        |
|--------------------------|----------------------------------------|
| Ramesh Jackpersad        | Radiologist                            |
| Kgaugelo Moropane        | Radiographer                           |
| Boitsholo Mfolo          | Radiographer                           |
| Khabonina Malomane       | Radiographer                           |
| Hlolisile Khumalo        | Nursing Manager                        |
| Nompilo Buthelezi        | Training Coordinator                   |
| Nozipho Mbonambi         | Professional Nurse                     |
| Hloniphile Ngubane       | Professional Nurse                     |
| Thokozani Simelane       | Professional Nurse                     |
| Khanyisani Buthelezi     | Professional Nurse                     |
| Sphiwe Ntuli             | Professional Nurse                     |
| Nombuyiselo Zondi        | Professional Nurse                     |
| Siboniso Nene            | Professional Nurse                     |
| Bongumenzi Ndlovu        | Enrolled Nurse                         |
| Talente Ntimbane         | Enrolled Nurse                         |
| Mbali Mbuyisa            | Enrolled Nurse                         |
| Xolani Mkhize            | Enrolled Nurse                         |
| Melusi Sibiya            | Enrolled Nurse                         |
| Ntombiyenkosi Ntombela   | Enrolled Nurse                         |
| Mandisi Dlamini          | Enrolled Nurse                         |
| Hlobisile Chonco         | Enrolled Nurse                         |
| Hlengiwe Dlamini         | Enrolled Nurse                         |
| Doctar Mlambo            | Enrolled Nurse                         |
| Nonhlanhla Mzimela       | Enrolled Nurse                         |
| Zinhle Buthelezi         | Enrolled Nurse                         |
| Zinhle Mthembu           | Enrolled Nurse                         |
| Thokozani Bhengu         | Enrolled Nurse                         |
| Sandile Mthembu          | Enrolled Nurse                         |
| Phumelele Mthethwa       | Enrolled Nurse                         |
| Zamashandu Mbatha        | Enrolled Nurse                         |
| Welcome Petros Mthembu   | Enrolled Nurse                         |
| Anele Mkhwanazi          | Clinical Research Assistant Supervisor |
| Mandlakayise Zikhali     | Clinical Research Assistant Supervisor |
| Phakamani Mkhwanazi      | Clinical Research Assistant            |
| Ntombiyenhlahl Mkhwanazi | Clinical Research Assistant            |
| Rose Myeni               | Clinical Research Assistant            |
| Fezeka Mfeka             | Clinical Research Assistant            |
| Hlobisile Gumede         | Clinical Research Assistant            |
| Nonceba Mfeka            | Clinical Research Assistant            |
| Ayanda Zungu             | Clinical Research Assistant            |
| Hlobisile Gumede         | Clinical Research Assistant            |
| Nonhlanhla Mfekayi       | Clinical Research Assistant            |
| Smangaliso Zulu          | Clinical Research Assistant            |
| Mzamo Buthelezi          | Clinical Research Assistant            |
| Senzeni Mkhwanazi        | Clinical Research Assistant            |
| Mlungisi Dube            | Clinical Research Assistant            |
| Philippa Mathews         | Clinical Governance                    |
| Siphephelo Dlamini       | AHRI Nursing Manager                   |

|                        |                                               |
|------------------------|-----------------------------------------------|
| Hosea Kambonde         | IT Systems Developer                          |
| Lindani Mthembu        | Information Technology Assistant              |
| Seneme Mchunu          | Information Technology Assistant              |
| Sibahle Gumbi          | Research Admin Assistant                      |
| Tumi Madolo            | Research Data Manager                         |
| Thengokwakhe Nkosi     | Driver                                        |
| Sibusiso Mkhwanazi     | Driver                                        |
| Sibusiso Nsibande      | Driver                                        |
| Mpumelelo Steto        | Driver                                        |
| Sibusiso Mhlongo       | Driver                                        |
| Velile Vellem          | Driver                                        |
| Pfarelo Tshivase       | Driver                                        |
| Jabu Kwindu            | Driver                                        |
| Bongani Magwaza        | General Worker                                |
| Siyabonga Nsibande     | General Worker                                |
| Skhumbuzo Mthombeni    | General Worker                                |
| Sphiwe Clement Mthembu | General Worker                                |
| Antony Rapulana        | Laboratory Technologist                       |
| Jade Cousins           | Laboratory Technologist                       |
| Thabile Zondi          | Laboratory Technologist                       |
| Nagavelli Padayachi    | Laboratory Technologist                       |
| Freddy Mabetlela       | Laboratory Technologist                       |
| Simphiwe Ntshangase    | Laboratory Technician/LIMS Administrator      |
| Nomfundo Luthuli       | Laboratory Technician                         |
| Sithembile Ngcobo      | Laboratory Technologist                       |
| Kayleen Brien          | Laboratory Technologist                       |
| Sizwe Ndlela           | Laboratory Technician                         |
| Nomfundo Ngema         | Laboratory Technician                         |
| Nokukhanya Ntshakala   | Laboratory Technician                         |
| Anupa Singh            | Laboratory Technician                         |
| Rochelle Singh         | Laboratory Technician                         |
| Logan Pillay           | Laboratory Technician                         |
| Kandaseelan Chetty     | Laboratory Technician                         |
| Ashentha Govender      | Laboratory Technician                         |
| Pamela Ramkalawon      | Laboratory Research Technician                |
| Nondumiso Mabaso       | Laboratory Intern                             |
| Kimeshree Perumal      | Laboratory Intern                             |
| Senamile Makhari       | Biorepository Laboratory Technician           |
| Nondumiso Khuluse      | Biorepository Laboratory Technician           |
| Nondumiso Zitha        | Biorepository Research Assistant              |
| Hlengiwe Khathi        | Biorepository Research Assistant              |
| Mbuti Mofokeng         | Clinical Specimen Driver/Laboratory Assistant |
| Nomathamsanga Majozi   | Public Engagement                             |
| Nceba Gqaleni          | Public Engagement                             |
| Hannah Keal            | Communications                                |
| Phumla Ngcobo          | Communications                                |

|                 |                       |
|-----------------|-----------------------|
| Costa Criticos  | Operational Oversight |
| Raynold Zondo   | Operational Oversight |
| Dilip Kalyan    | Operational Oversight |
| Clive Mavimbela | Operational Oversight |
| Anand Ramnanan  | Procurement           |
| Sashin Harilall | Grants Office         |
